## **Platelet phosphorylated TDP- 43: An exploratory study for a peripheral surrogate biomarker development for Alzheimer's disease**

**Rodger Wilhite, Jessica Sage, Abdurrahman Bouzid, Tyler Primavera,**

**Abdulbaki Agbas <sup>(\*)</sup>**

Division of Basic Sciences, College of Osteopathic Medicine, Kansas City University of  
Medicine and Biosciences

1750 Independence Avenue, Kansas City, MO64106

Running title: *Platelet TDP-43, a dynamic biomarker for Alzheimer's disease*

(\*) Lead author: Abdulbaki Agbas, [aagbas@kcumb.edu](mailto:aagbas@kcumb.edu), (816)654-7614

**Keywords:** TDP-43, human platelet, Alzheimer's disease, hippocampus, surrogate marker

---

### **ABSTRACT**

Alzheimer's disease (AD) is the sixth leading cause of death in the United States. The World Health Organization predicted that the world population with AD will rise to about 75 million by 2030 [1]. Therefore, AD and other forms of dementia create a non-curable disease population, and a socioeconomic burden in world's societies. It is imperative to diagnose AD and other neurodegenerative diseases at their early stage. Consequently, to develop a blood- based biomarker is important so that the remedial or disease-altering therapeutical intervention for AD patients would be available at early stage of the disease. We have identified an easy, feasible, cost-effective, and less invasive assay method that measures a cellular protein that may be a potential biomarker candidate for the neurodegenerative diseases; platelet phosphorylated Transactive Response DNA Binding Protein 43 (pTDP-43). This protein recently gained an attention that can be served for monitoring the development of at least two neurodegenerative diseases (i.e., AD and amyotrophic lateral sclerosis, ALS). We have identified an assay platform and generated some preliminary data may suggest that the platelet TDP-43 that were increased (<65%) in post-mortem AD brain regions and similar trends were also observed in AD patient's platelet. In this study, we propose that platelet phosphorylated form of TDP-43 could be used as a potential surrogate biomarker that is easy to measure, reproducible, sensitive, and cost effective for screening the patients with some early clinical signs of AD and can be used to monitor disease prognosis.

## INTRODUCTION

As the world population is getting older, the incidence of Alzheimer's disease (AD) is in rise. More than 5 million Americans are living with the disease and projected AD patients will be 13.8 M by 2050 in US and only 1-in-4 people with AD have been diagnosed AD [2]. The rising cost of health care for AD patients has a socioeconomic negative impact in the world society as well as burdens on caretakers. The early diagnosis of AD could be critical for starting a timely treatment with current treatment options as well as designing new effective disease-modifying approaches. There is a great need to improve early detection and move diagnosis earlier in the course of neurodegenerative diseases such as Alzheimer's disease (AD), Amyotrophic lateral sclerosis (ALS), Parkinson's disease (PD), frontotemporal lobar disease (FTLD), and others so that timely starting disease-specific treatment would be effective. Current diagnostic tests, for example, for AD rely on expensive brain imaging technology that are available only to a few patients [3], cognitive and psychiatric assessment or require cerebrospinal fluid samples which requires invasive and lumbar puncture that has a negative public perception in several countries [4]; however, none show high reliability and sensitivity and diagnosis is confirmed post-mortem pathological examination. Therefore, to identify biomarkers for AD as well as other neurodegenerative diseases is an

urgent task. More specifically, the new biomarker should bear the feature of sensitive, specific, reliable, readily available for rural areas, non-invasive sampling method, and affordable. Such biomarkers are in great demand for early stages of neurodegenerative diagnosis and making dementia screening as a viable approach. We have focused on an AD-specific peripheral cellular biomarker in this study. There are several fluid based biomarker candidates for AD [5-8]; however, either the milieu of the diagnostic biomolecule or the measurement platforms have made many of them unfavorable candidates. There is a new potential biomarker candidate for AD, Trans-activation response DNA/RNA binding protein (TARDBP). Due to its 43 kDa size, TDP-43 acronym will be used throughout this paper.

Substantial research has been conducted to decipher the role of TDP-43 in different cellular events as well as its role(s) in neurodegenerative disease states [9-13]. TDP-43 is ubiquitously expressed in all nucleated cells [14]. Although TDP-43 is a nuclear protein [15], it has an ability to shuttle in-and-out between nucleus and cytoplasm due to having nuclear localization and nuclear export sequences [16-19]. The TDP-43 in cytosol is not well described yet; however the phosphorylated derivatives of TDP-43 in neurodegenerative diseases may be

responsible forming the hyperphosphorylated aggregates and could be considered as a signature biomolecule. There are 28 potential phosphorylation sites in TDP-43 protein shown in **Fig. 1A**. Majority of the phosphorylation occurs in serine amino acid (Ser)-rich C-terminus. In neurodegenerative disease such as FTDL, AD, and ALS, the tissue levels of TDP-43 are increased and mostly becoming more detectable in about 75% of the brain tissues from AD patients [10, 21]. The blood TDP-43 levels may also be elevated in AD patients, suggesting that TDP-43 may be considered as a potential surrogate biomarker in neurodegenerative diseases [22, 23]. The concern may emerge whether peripheral cellular TDP-43 levels are relevant to that of brain in patients with neurodegeneration. TDP-43 is prone to phosphorylation and cleavage if it stays longer in cytosol [24]. A recent study has provided some evidence that TDP-43 mislocalization was an early or pre-symptomatic event and was later associated with neurons [25]. These studies suggest that post-translationally modified (i.e. phosphorylation) TDP-43 may be assigned as a disease specific protein. To monitor and record disease relevant biomolecules in the brain are a challenge due to multiple sampling from brain and spinal cord tissues are unfeasible and invasive. Since the sampling from the living AD patients (i.e. brain) has not been a favored option for studying post-translational modifications

located in cytosol and consistently observed in inclusion bodies in neurons [15] rather than nucleus. In Pick disease (PiD), the presence of TDP-43 inclusions suggests that TDP-43 accumulation and modification are important components of PiD [20]. Post-translationally modified TDP-43 aggregates are observed in post-mortem brain tissue sections [14]. TDP-43 positive inclusion bodies are of TDP-43, we thought of blood platelets that may serve as a proxy venue for AD brain in which the aberrant TDP-43 is detectable. Platelets are anuclear blood cell fragments that derived from megakaryocytes [26] and share biochemical properties of neurons [27-29]. Accordingly, several investigators consider using platelets as a venue to study the pathogenesis of neurodegeneration. We chose platelets to identify and measure both total and the phosphorylated TDP-43 protein species (i.e., monomers and oligomers) in AD because (i) they are easy to repeatedly obtain from the patients with minimal distress (ii) their life span is short (7-10 days) [30] which will reflect dynamic changes on phosphorylated TDP-43, and (iii) it was reported that platelets transiently open the blood brain barrier (BBB) [31], consequently, biomolecules may come to contact to blood stream and platelets absorb them; (iv) serum/plasma proteins and other biomolecules are exposed to dilutions and results in analytical challenges, and (v) serum albumin and immunoglobulin interference for the

assay are minimized. We think that platelets may mirror the certain biochemical changes in brain. In this study, we aimed to demonstrate that phosphorylated TDP-43 protein species

## **MATERIAL METHODS**

**Reagents:** Anti hTARDBP polyclonal antibody (ProteinTech Group, Chicago, IL; Cat#1078-2-AP) and phosphorylated derivatives of the pTDP-43 antibodies (CosmoBio USA; Cat#TIP-TD-P09, TIP-TD-P07, TIP-PTD-P05, TIP-PTD-P03, TIP-PTD-M01, TIP-PTD-P01, TIP-PTD-P02, TIP-PTD-P04) (Abcam Cat# Ab184683, ProteinTech Cat# 10782-2-AP, 66318-1-Ig, 22309-1-p(discontinued); Sigma Cat# T1705, SAB4200225; Biolegend Cat# 829901) were commercially purchased. Citrate Wash Buffer (11mM glucose, 128mM NaCl, 4.3 mM  $\text{NaH}_2\text{PO}_4$ , 7.5 mM  $\text{Na}_2\text{HPO}_4$ , 4.5 mM sodium citrate, and 2.4mM citric acid, pH 6.5)[32] and platelet rupture Buffer (250 mM sucrose, 1 mM EDTA, 10 mM Tris, pH 7.4) were prepared in our lab using the reagent grade chemicals. Phosphatase inhibitor cocktail (Calbiochem # D00147804) (1:1,000) and protease inhibitor cocktail (Calbiochem# 539134) (1:2,000) were added into the platelet rupture buffer just before use to preserve TDP43 protein from the proteolytic degradation and dephosphorylation processes.

**Human Platelets:** Human blood-platelet samples were obtained from the following sources; (1) The Bio-specimen Bank of University of Kansas Medical

Center (KUMC); platelets were previously collected from AD patients and age-matched otherwise healthy subjects and stored at  $-80^\circ\text{C}$  and (2) ALS clinic at the University of Kansas Medical Center, Kansas City. ALS patient platelet lysates were utilized as a disease control for identifying a specific antibody for AD patient platelets. The ALS patients were clinically diagnosed by physicians and the subject identities for the biosamples were deidentified. All patients and otherwise healthy individuals were given consent form before obtaining the blood samples. The sample collection procedure was approved by the Institutional Review Board of Kansas City University of Medicine and Biosciences (KCU) and the University of Kansas Medical Center (KUMC).

Platelets were isolated from freshly drawn blood from clinically diagnosed patients and otherwise healthy subjects according to a standard two-step low speed centrifugation technique as described in the literature with some minor modifications [33]. The platelet pellets were ruptured, sonicated in 0.6 ml of rupturing buffer with the protease and phosphatase inhibitors, and subjected to high speed centrifugation ( $16,000 \times g$ ; 30 min;  $4^\circ\text{C}$ ) to obtain platelet cytosol. Protein concentrations

were determined by BCA spectrophotometric method [34]. The samples were aliquot and stored at -80°C until use.

### **Human Brain Sample preparation**

The brain tissue samples from post-mortem AD patients and age-matched control subjects were obtained from the Bio-specimen bank of KU Medical Center. The 100-200 mg of excised three regions of human brain (frontal cortex, cerebellum, and hippocampus) were removed and homogenized in a Teflon-pestle glass homogenizer containing ice-cold buffer (0.32 M sucrose, 0.5 mM MgSO<sub>4</sub>, 10 mM epsilon-caproic acid, 0.1 mM EGTA, protease inhibitor cocktail 0.1% v/v, 10 mM HEPES, pH 7.4). Tissue: Homogenate buffer ratio was kept in 1:20. The homogenization was carried out in an ice bucket with a 8-10 strokes. The homogenate was aliquoted and stored in -80°C until use. Protein concentrations were analyzed by BCA method [34].

**Western Blot:** The brain homogenate and platelet proteins were resolved in 12 % SDS-PAGE and 4-20% SDS-PAGE, respectively under the reducing conditions. The proteins were transferred onto a PVDF membrane and subsequently the membrane was probed with both pan anti-TDP-43 and several anti-phosphorylated TDP-43 antibodies. The protein bands were visualized by enhanced chemiluminescence and infrared dye

based fluorescence methods, and they were analyzed by NIH's ImageJ (V.1.46r) and Image Studio™ Lite software (Ver 4.0)

**Capillary Electrophoresis:** The platelet lysates from AD, ALS patients and otherwise healthy subject cohort were analyzed by a simple western system, a new technology developed by ProteinSimple, Inc., USA. This technology does not require classical SDS/PAGE and Western blotting components. It uses very little sample mix volume (~3-5 ul). The samples were analyzed in duplicate and both capillary electropherogram and pseudo protein bands were generated and analyzed by the system software (Compass for Simple Western, v.3.0.9).

**Statistical analysis:** Paired t-test was employed for statistical analysis.

### **RESULTS:**

**TDP-43 protein levels differentially increase in AD-patient brain and this increase reflects in platelets.** In early stage of this work, we have shown that total TDP-43 protein levels were increased in the brain regions of post-mortem AD patients (n=3). The most noticeable TDP-43 increase was observed in hippocampus region while frontal cortex and cerebellum regions reflected a slight TDP-43 increase as compare to non-symptomatic control subjects (**Fig. 2A**). Total TDP-43 aggregates were observed in three different brain regions and the most

notably aggregates were observed in hippocampus region (**Fig.2B**). We have also observed that the platelet lysate TDP-43 levels were increased by <65 % in AD patients (n=3) (**Fig. 2C**) in our early phase of this study. Readers should be advised that platelet lysates were obtained from a separate AD patient cohort, because the University of Kansas Medical Center Bio-specimen repository did not have the matching post-mortem tissue and platelet lysates from the same AD patients and non-symptomatic control individuals.

**A sequence specific anti-phosphorylated TDP-43 Ab distinguishes AD from other neurodegenerative disease.** In the next phase of this work, we have focused on to identify an AD specific anti-phosphorylated TDP-43 Ab as a screening tool in a relatively large subject cohort (n= 10 in each group). First, we have performed a computer based Predictor of natural Disordered Region (PONDR<sup>®</sup>) algorithm using TDP-43 sequence (NCBI accession code: Q5R5W2.1). Disordered Enhanced Phosphorylation Predictor (DEPP) analysis predicted 28 potential phosphorylation site and majority of them Ser amino acid enriched C-terminus site (aa 369-410) (**Fig.1A**). Another algorithm (PONDR<sup>®</sup> VL3-BA) was employed to predict on TDP-43 regions of 152 long regions of disorder that were characterized by other methods (**Fig.1B**). Nuclear magnetic resonance (NMR) studies also revealed that about 80 amino acid sequence

from C-terminus region of TDP-43 was identified as the most disorderly region [35, 36] where the majority of phosphorylation sites were located. Therefore, we have tested several anti-Phosphorylated TDP-43 antibodies from various vendors (ProteinTech, Abcam, Cosmobio-USA, Sigma, and Biolegend) to identify an AD-specific antibody that can be used for screening assays. An anti-phospho (S409/410) TDP-43 antibody (ProteinTech Cat# 22309-1-AP) was identified as a potential antibody that discriminates AD platelet lysate phospho-TDP-43 profile from that of amyotrophic lateral sclerosis (ALS) (**Fig. 3A**) and from that of non-symptomatic otherwise healthy age-matched subjects (**Fig.3B**). A prominent protein peak at about 62 kDa position was consistently observed in platelet lysates (**Fig.3A**).

## **DISCUSSION:**

Misfolded aberrant protein aggregations are frequently observed in neurodegenerative diseases [37]. Pathologically misfolded protein aggregate formation occurs long before the measurable cognitive decline [38]. Therefore, it is essential to develop a feasible, cost-effective, and specific method or an assay system to analyze the biomarker biomolecules. This test may aid to medical evaluations to predict AD setting before the clinical manifestations revealed.

Intracellular TDP-43 species such as aggregates, cleaved TDP-43 fragments,

and post-translationally modified TDP-43 have been found in neurodegenerative diseases [39]. The characteristics of TDP43 as a regulator of mRNA translation and an inducer for the stress granules (SG) formation may suggest that post-translationally modified TDP-43 may affect the pathological course of the diseases much earlier than previously thought [40]. Cell-based TDP-43 chemical modification and aggregation model may be a good strategy [41] to investigate whether peripheral cells would be considered as a platform where the surrogate biomarker such as TDP-43 be analyzed. Therefore, we have hypothesized that platelet phosphorylated TDP-43 may be considered as a viable surrogate dynamic biomarker.

In this study, we have provided some new findings that platelet TDP-43 and its phosphorylated derivatives may reflect the changes in TDP-43 profile in human AD brain. We have focused on platelets for several reasons; (i) the life span of circulating platelets is about 8-10 days [42]. The half-lives of TDP-43 was studied in primary fibroblasts obtained from human ALS patients that have dominant G298S mutation in TDP-43 [43]; the half-life of mutated TDP-43 ( $t_{1/2} = \sim 11$  hours) was extended by about 2.8-fold over the wild-type cells ( $t_{1/2} = 14$  hours). Although no half-life studies on platelet TDP-43 was conducted, platelet may reflect the current profile of aberrant TDP-43; (ii) platelet secretes platelet activating factor which induces

transient blood brain barrier (BBB) opening [31] where aberrant TDP-43 loaded glia cells may come to contact with blood cells and TDP-43 would be transferred via cell-to-cell contact; (iii) platelets are anuclear blood cell fragments originated from megakaryocytes and reflects mostly cytosolic TDP-43, which are more prone to be modified (i.e., phosphorylation, aggregation, and fragmentation), and (iv) platelets are very easy to obtain from venous blood with a minimum invasion for patients comfort, and (v) repeated sampling is possible to study the progress of disease. These are the known advantages of platelets to be considered as a platform to analyze TDP-43 protein profile which also reflects same/similar changes in central nervous system.

To identify an AD-selective antibody was a major undertaking. We have tested several antibodies (eight) that raised against to different regions of TDP-43 as well as phosphorylated species of TDP-43 and they were purchased from three vendors (ProteinTech, Cosmobio-USA, Abcam). Among three, We have identified a anti-phospho (S409/410)TDP-43 antibody from ProteinTech as an AD-selective antibody. Although, several other antibodies that were raised against to same region (i.e. S409-410) of TDP-43, ProteinTech antibody somehow was specific for AD samples. It may be due to either clone that produces antibody is different or TDP-43 modification is different in AD than ALS. We have used

ALS platelet samples for testing the specificity of the antibody that showed high levels of pTDP-43. We are now identifying an ALS-selective antibody that does not show positive reaction for AD platelet lysates in a separate project.

There are several studies in the literature that have reported TDP-43 levels in serum and brain samples obtained from AD patients. Kadokura et al, reported that more than 30 % of diagnosed AD cases showed TDP-43 pathology [44]. Similar studies were also reported elsewhere [10, 45, 46]. All these studies providing considerable supporting evidences that noticeable percent of AD cases are linked to altered TDP-43. Foulds et al., have suggested but have not definitely showed that plasma TDP-43 levels might discriminate AD with TDP-43 pathology from those without TDP-43 pathology [22]. We think that their inconclusive observation may be due to the complex nature of serum which does not reflect the chemical modifications of TDP-43 based on ELISA method. It should be considered that unless primary antibody used in ELISA is an isoformic specific for the target protein, the method will not provide the target protein specific data. Serum contains some very abundant biomolecules such as albumin and immunoglobulins. These biomolecules may mask the low levels of TDP-43 in serum based assays that positive recognition of TDP-43 by its specific antibody may greatly be reduced. That is why we justified turning to platelets as a biological milieu, which

will reflect more concentrated and encapsulated population of TDP-43 without interference of serum albumin and immunoglobulins.

Herman et al., have observed an increased level of TDP-43 in cortical autopsies of AD patients [47], suggesting that TDP-43 pathology may be the common point among the AD, ALS, and Frontotemporal lobar dementia (FTLD). We also believe that TDP-43 is situated in the very critical position of several neurodegenerative diseases. Youman and Wolozin further placed the TDP-43 as a causative factor in AD since TDP-43 has been shown to increase A- $\beta$  accumulation through increased  $\beta$ -secretase activation [48]. It is not clear whether normal TDP-43, cleaved, and/or post-translationally modified TDP-43 activates  $\beta$ -secretase. Herman et al., have demonstrated that A $\beta_{1-42}$  increases the full length, cleaved, and phosphorylated TDP-43 levels, then this TDP-43 further increases the  $\beta$ -secretase activity which will produce more A $\beta_{1-40}$  and APP C-terminal fragments [49]. This observation is critical in the involvement of TDP-43 in AD progress. However, a recent study puts more emphasis on extreme N-terminus modification of TDP-43 that such modification activates caspase-3 [50] and subsequently the cleavage of TDP-43 proteins since TDP-43 has three caspase cleavage sites (Entrez accession NP\_031401) that generates ~ 42,35, and 25 kDa TDP-43 fragments; however, which of the fragments is more



fibrillogenic remains unanswered [51]. A recent study has reported a new caspase-4 cleavage site at Asp174 that produces ~25 kDa C-terminal fragment [52]. In another study, the investigators have shown that a mammalian enzyme asparaginyl endopeptidase cleaved and produced two immunogenic TDP-43 fragments (35 and 32 kDa) [53]. These fragmented TDP-43 species are more likely encapsulated in immunoreactive inclusion bodies that may be associated TDP-43 relevant disorders [51]. In our view, there are several enzymatic cleavages of TDP-43 that produces a cleaved toxic TDP-43 fragments that may be easily phosphorylated, subsequently these fragments will form first aggregation nucleus through protein-protein interaction yielding TDP-43 enriched plaques in CNS tissue. All these cited studies as well as many others strengthened the conception that TDP-43 protein profile in Alzheimer's disease may be a good dynamic biomarker that ought to be comprehensively studied.

TDP-43 proteinopathy is characterized by decreased solubility, hyperphosphorylation and the generation of 25-KDa C-terminal fragment [15, 54-56]. We also have observed ~35 and ~25 kDa TDP-43 fragments in early stage of this work; we thought that they may represent the degradation products of TDP-43 due to either storage of samples at -80°C for extended period of time or the degradation is due to old age of the subjects (**Fig. 2C**). This observation leads to the future studies

that ought to be conducted that address the TDP-43 fragmentation issue. In addition to these findings, we also have noticed TDP-43 protein aggregation in select brain regions (**Fig. 2A, 2B**). We have anticipated this observation that hippocampal TDP-43 protein aggregation level would be relatively high and statistically significant ( $P \leq 0.015$ ; t-test) (**Fig. 2A**). We have shown in our previous studies that the hippocampal region is very vulnerable to oxidative stress in aging process [57]. This also partially explains that increased level of TDP-43 aggregation in hippocampus region.

In tissue, cytosolic TDP-43 protein, especially toxic monomers [58], begin to form hyperphosphorylated species and sequesters into inclusion body as part of the defense mechanism of the organism, suggesting that cytosolic pTDP-43 or detergent-soluble TDP-43 protein is toxic [9]. We did not verify inclusion body presence in platelets. What we know that cytosolic TDP-43 is present in platelets and phosphorylated species of TDP-43 is elevated in Alzheimer's disease. We speculate that anuclear platelet cytosol represents toxic form of TDP-43 species. How aberrant brain TDP-43 appeared in peripheral blood cell? One way of explanation might be that TDP-43 protein has C-terminus Q/N rich region [59]; therefore, this protein may have the characteristics of prion-like proteins that propagates itself [60, 61] and transfects the other cells. Kanouchi et al., have reviewed the recent findings about

prion-like characteristics of TDP-43 propagation and offered the concepts of contiguous and non-contiguous propagation of misfolded proteins including TDP-43 [62]. Considering the leaky BBB in neurodegenerative diseases as well as the ability of platelets transiently opening the BBB via releasing platelet activating factors [31], it is conceivable that aberrant TDP-43 in astrocytes may transfect the blood cells by means of cell-to-cell infection through having access to blood stream. Conversely, one can argue that platelets are the pTDP43 carrier as part of the AD development and load the glial cells by cell-to-cell infection through a leaky BBB. The concept of cell-to-cell misfolded protein infection was recently reviewed [63]. Our present data only suggests that what we observed in AD brain elevated TDP-43 protein pattern was reflected to the AD patient's platelet TDP-43. Yet, we are well aware of that we were unable to obtain the platelets and post-mortem brain tissues from the same subject, which could be the better representation of TDP-43 profile. In this study, we have provided a trend of TDP-43 profile in AD and age-matched healthy subjects (**Fig. 2A, 2C**). We are in process of nation-wide searching the bio-specimen banks to obtain platelets and post-mortem brain samples from the same individuals and we will repeat the analyzing TDP-43 assays to verify our results presented in this study. To our knowledge, we are the first research group to identify the TDP-43 profile in platelets which could be considered as a

surrogate dynamic biomarker to monitor the disease progress as well as the pharmacological treatment response.

Our findings about the presence of phosphorylated TDP-43 in platelets from AD patients are intriguing and led us to ask the question whether AD is an exclusively CNS or peripheral system disease? Morris et al. have discussed this issue [64] and the lead author of this manuscript had personal communication with one of the leading author this paper [65] and beginning to address this dilemma.

The other provocative approach would be that mitochondria may be a potential target for the soluble TDP-43 protein and its fragmented derivatives (i.e., ~35, ~25 kDa fragments). The malfunction of mitochondria and low level of bioenergetics are hallmarks in neurodegenerative diseases and this issue had been discussed elsewhere [66, 67]. We have observed a ~ 25 kDa TDP-43 species in mitochondria-enriched preparations from healthy human platelets. (**Supplemental Fig.1**). We don't have an answer whether this is mislocalization of TDP-43 fragment or a naturally occurring in mitochondria. However, we may consider to decipher the relationship between TDP-43 and transport protein of outer membrane (TSPO) of mitochondria [68], which may explain how TDP-43 fragment entered into mitochondria.

We have had some obstacles for obtaining sufficient number of control

and ALS post-mortem human brain and spinal cord tissues to correlate the platelet TDP-43 levels due to limited availability of such samples in local brain banks to provide a supportive data that this notion would be true in other neurodegenerative diseases. The challenging question would be when TDP-43 began to form aggregates? Which TDP-43 species initiates the seed for inclusions? It is well known fact that protein aggregations occurs long before the clinical manifestations revealed [37]. In vitro biophysical studies in cell culture and mouse brain have suggested that TDP-43 is naturally tend to form a dimeric protein as cited in a recent review [69]. Can we monitor the TDP-43 modifications and aggregations during the disease progress? This issue was always a challenge and led us to plan a longitudinally studies in future. Perhaps, platelet TDP-43 approach will make these kinds of studies feasible. As discussed by Budini et al. cell-based TDP-43 aggregation and modifications model is a powerful tool [41] to test novel therapeutic strategies aimed at preventing and or reducing TDP-43 aggregation in AD.

In near future, as suggested by Cohen and Kelly [70] the researchers may consider some therapeutic approaches by which a cell permeable chemical chaperons that binds to misfolded protein and stabilize the folded state and thereby reduce the protein misfolding. In normal circumstances the molecular chaperons and other housekeeping mechanisms ensure that potentially

toxic aberrant proteins or pre-fibrillary aggregates are neutralized before they can do cellular damage [71, 72]. Therefore, the researchers need to know the folding features of protein of interest. If we know the folding features of TDP-43 and measuring the occurrence of misfolded, disease prone TDP-43 early enough, we may be able to formulate and maintain to stabilize the misfold protein, which opens up a new therapeutical venues for neurodegenerative disease treatment.

### **Acknowledgements**

Research reported in this publication was supported by several pilot project funds from QS85523J, University of Kansas Medical Center Research Institute, Inc.(QS85523J), FONTIERS-Trail Blazer Award (01-2429-001), and KCU intramural grants. AA acknowledges the contributions of the student research fellows of College of Osteopathic Medicine. We are grateful for Drs. Eric Vidoni and Kathy Newman, and KU Medical Center Bio-specimen facilities for providing brain tissues and platelet lysates.

### **BIBLIOGRAPH**

1. WHO, [http://www.who.int/mental\\_health/neurology/dementia/en/](http://www.who.int/mental_health/neurology/dementia/en/).
2. Alzheimer'sdiseasestatistics, <http://www.alzheimers.net/resources/alzheimers-statistics/>.

3. Henriksen, K., et al., *The future of blood-based biomarkers for Alzheimer's disease*. *Alzheimers Dement*, 2014. **10**(1): p. 115-31.
4. Schneider, P., H. Hampel, and K. Buerger, *Biological marker candidates of Alzheimer's disease in blood, plasma, and serum*. *CNS Neurosci Ther*, 2009. **15**(4): p. 358-74.
5. O'Bryant, S.E., et al., *Blood-based biomarkers in Alzheimer disease: Current state of the science and a novel collaborative paradigm for advancing from discovery to clinic*. *Alzheimers Dement*, 2017. **13**(1): p. 45-58.
6. Ritter, A. and J. Cummings, *Fluid Biomarkers in Clinical Trials of Alzheimer's Disease Therapeutics*. *Front Neurol*, 2015. **6**: p. 186.
7. Hertze, J., et al., *Evaluation of CSF biomarkers as predictors of Alzheimer's disease: a clinical follow-up study of 4.7 years*. *J Alzheimers Dis*, 2010. **21**(4): p. 1119-28.
8. Rosa-Neto, P., et al., *Fluid biomarkers for diagnosing dementia: rationale and the Canadian Consensus on Diagnosis and Treatment of Dementia recommendations for Canadian physicians*. *Alzheimers Res Ther*, 2013. **5**(Suppl 1): p. S8.
9. Ugras, S.E. and J. Shorter, *RNA-Binding Proteins in Amyotrophic Lateral Sclerosis and Neurodegeneration*. *Neurol Res Int*, 2012. **2012**: p. 432780.
10. Amador-Ortiz, C., et al., *TDP-43 immunoreactivity in hippocampal sclerosis and Alzheimer's disease*. *Ann Neurol*, 2007. **61**(5): p. 435-45.
11. Baloh, R.H., *TDP-43: the relationship between protein aggregation and neurodegeneration in amyotrophic lateral sclerosis and frontotemporal lobar degeneration*. *FEBS J*, 2011. **278**(19): p. 3539-49.
12. Buratti, E. and F.E. Baralle, *The molecular links between TDP-43 dysfunction and neurodegeneration*. *Adv Genet*, 2009. **66**: p. 1-34.
13. Guo, W., et al., *An ALS-associated mutation affecting TDP-43 enhances protein aggregation, fibril formation and neurotoxicity*. *Nat Struct Mol Biol*, 2011. **18**(7): p. 822-30.
14. Geser, F., et al., *Motor neuron disease clinically limited to the lower motor neuron is a diffuse TDP-43 proteinopathy*. *Acta Neuropathol*, 2011. **121**(4): p. 509-17.
15. Neumann, M., et al., *Ubiquitinated TDP-43 in frontotemporal lobar degeneration and amyotrophic lateral sclerosis*. *Science*, 2006. **314**(5796): p. 130-3.
16. Buratti, E. and F.E. Baralle, *TDP-43: gumming up neurons through protein-protein and protein-RNA interactions*. *Trends Biochem Sci*, 2012. **37**(6): p. 237-47.
17. Fallini, C., G.J. Bassell, and W. Rossoll, *The ALS disease protein TDP-43 is actively transported in motor neuron axons and regulates axon outgrowth*. *Hum Mol Genet*, 2012. **21**(16): p. 3703-18.
18. Ayala, Y.M., et al., *Structural determinants of the cellular localization and shuttling of TDP-43*. *J Cell Sci*, 2008. **121**(Pt 22): p. 3778-85.
19. Fiesel, F.C. and P.J. Kahle, *TDP-43 and FUS/TLS: cellular functions and implications for neurodegeneration*. *FEBS J*, 2011. **278**(19): p. 3550-68.
20. Freeman, S.H., et al., *TAR-DNA binding protein 43 in Pick disease*. *J Neuropathol Exp Neurol*, 2008. **67**(1): p. 62-7.
21. Wilson, A.C., et al., *TDP-43 in aging and Alzheimer's disease - a review*. *Int J Clin Exp Pathol*, 2011. **4**(2): p. 147-55.
22. Foulds, P., et al., *TDP-43 protein in plasma may index TDP-43 brain pathology in Alzheimer's disease and frontotemporal lobar degeneration*.

- Acta Neuropathol, 2008. **116**(2): p. 141-6.
23. Verstraete, E., et al., *TDP-43 plasma levels are higher in amyotrophic lateral sclerosis*. Amyotroph Lateral Scler, 2012. **13**(5): p. 446-51.
24. Yamashita, T., S. Teramoto, and S. Kwak, *Phosphorylated TDP-43 becomes resistant to cleavage by calpain: A regulatory role for phosphorylation in TDP-43 pathology of ALS/FTLD*. Neurosci Res, 2016. **107**: p. 63-9.
25. Uchida, A., et al., *Non-human primate model of amyotrophic lateral sclerosis with cytoplasmic mislocalization of TDP-43*. Brain, 2012. **135**(Pt 3): p. 833-46.
26. Italiano Jr., J.E. and J.H. Hartwig, *Megakaryocyte and platelet structure*, in *Hematology, Basic Principles and Practice*, R. Hoffman, et al., Editors. 2005, Elsevier: USA. p. 1873-1880.
27. Stahl, S.M. and H.Y. Meltzer, *A kinetic and pharmacologic analysis of 5-hydroxytryptamine transport by human platelets and platelet storage granules: comparison with central serotonergic neurons*. J Pharmacol Exp Ther, 1978. **205**(1): p. 118-32.
28. Veitinger, M., et al., *Platelets, a reliable source for peripheral Alzheimer's disease biomarkers?* Acta Neuropathol Commun, 2014. **2**: p. 65.
29. Joseph, R., et al., *Serotonin may have neurotoxic properties*. Neurosci Lett, 1992. **136**(1): p. 15-8.
30. Junt, T., et al., *Dynamic visualization of thrombopoiesis within bone marrow*. Science, 2007. **317**(5845): p. 1767-70.
31. Fang, W., et al., *Platelet activating factor induces transient blood-brain barrier opening to facilitate edaravone penetration into the brain*. J Neurochem, 2014. **128**(5): p. 662-71.
32. Qureshi, A.H., et al., *Proteomic and phospho-proteomic profile of human platelets in basal, resting state: insights into integrin signaling*. PLoS One, 2009. **4**(10): p. e7627.
33. Vignini, A., et al., *Amyloid precursor protein expression is enhanced in human platelets from subjects with Alzheimer's disease and Frontotemporal lobar degeneration: A Real-time PCR study*. Exp Gerontol, 2013.
34. BCAproteinassaymethod, <http://www.assay-protocol.com/biochemistry/BCA-assay>.
35. Jacks, A., et al., *Structure of the C-terminal domain of human La protein reveals a novel RNA recognition motif coupled to a helical nuclear retention element*. Structure, 2003. **11**(7): p. 833-43.
36. Piovesan, D., et al., *DisProt 7.0: a major update of the database of disordered proteins*. Nucleic Acids Res, 2017. **45**(D1): p. D219-D227.
37. Ross, C.A. and M.A. Poirier, *Protein aggregation and neurodegenerative disease*. Nat Med, 2004. **10** Suppl: p. S10-7.
38. Jack, C.R., Jr., et al., *Hypothetical model of dynamic biomarkers of the Alzheimer's pathological cascade*. Lancet Neurol, 2010. **9**(1): p. 119-28.
39. Lagier-Tourenne, C., M. Polymenidou, and D.W. Cleveland, *TDP-43 and FUS/TLS: emerging roles in RNA processing and neurodegeneration*. Hum Mol Genet, 2010. **19**(R1): p. R46-64.
40. Bowden, H.A. and D. Dormann, *Altered mRNP granule dynamics in FTL D pathogenesis*. J Neurochem, 2016. **138** Suppl 1: p. 112-33.
41. Budini, M., et al., *Cellular model of TAR DNA-binding protein 43 (TDP-43) aggregation based on its C-terminal Gln/Asn-rich region*. J Biol Chem, 2012. **287**(10): p. 7512-25.
42. Thon, J.N. and J.E. Italiano, *Platelets: production, morphology and ultrastructure*. Handb Exp Pharmacol, 2012(210): p. 3-22.
43. Ling, S.C., et al., *ALS-associated mutations in TDP-43 increase its*

- stability and promote TDP-43 complexes with FUS/TLS. Proc Natl Acad Sci U S A, 2010. **107**(30): p. 13318-23.
44. Kadokura, A., et al., *Regional distribution of TDP-43 inclusions in Alzheimer disease (AD) brains: their relation to AD common pathology*. NeuroPathology, 2009. **29**(5): p. 566-73.
45. Uryu, K., et al., *Concomitant TAR-DNA-binding protein 43 pathology is present in Alzheimer disease and corticobasal degeneration but not in other tauopathies*. J Neuropathol Exp Neurol, 2008. **67**(6): p. 555-64.
46. Josephs, K.A., et al., *Abnormal TDP-43 immunoreactivity in AD modifies clinicopathologic and radiologic phenotype*. Neurology, 2008. **70**(19 Pt 2): p. 1850-7.
47. Herman, A.M., et al., *beta-amyloid triggers ALS-associated TDP-43 pathology in AD models*. Brain Res, 2011. **1386**: p. 191-9.
48. Youmans, K.L. and B. Wolozin, *TDP-43: a new player on the AD field?* Exp Neurol, 2012. **237**(1): p. 90-5.
49. Herman, A.M., et al., *Wild type TDP-43 induces neuro-inflammation and alters APP metabolism in lentiviral gene transfer models*. Exp Neurol, 2012. **235**(1): p. 297-305.
50. Sasaguri, H., et al., *The extreme N-terminus of TDP-43 mediates the cytoplasmic aggregation of TDP-43 and associated toxicity in vivo*. Brain Res, 2016. **1647**: p. 57-64.
51. Zhang, Y.J., et al., *Progranulin mediates caspase-dependent cleavage of TAR DNA binding protein-43*. J Neurosci, 2007. **27**(39): p. 10530-4.
52. Li, Q., et al., *The cleavage pattern of TDP-43 determines its rate of clearance and cytotoxicity*. Nat Commun, 2015. **6**: p. 6183.
53. Herskowitz, J.H., et al., *Asparaginyl endopeptidase cleaves TDP-43 in brain*. Proteomics, 2012. **12**(15-16): p. 2455-63.
54. Arai, T., et al., *TDP-43 is a component of ubiquitin-positive tau-negative inclusions in frontotemporal lobar degeneration and amyotrophic lateral sclerosis*. Biochem Biophys Res Commun, 2006. **351**(3): p. 602-11.
55. Hasegawa, M., et al., *Phosphorylated TDP-43 in frontotemporal lobar degeneration and amyotrophic lateral sclerosis*. Ann Neurol, 2008. **64**(1): p. 60-70.
56. Zhang, Y.J., et al., *Aberrant cleavage of TDP-43 enhances aggregation and cellular toxicity*. Proc Natl Acad Sci U S A, 2009. **106**(18): p. 7607-12.
57. Bao, X., et al., *Transgenic expression of Glud1 (glutamate dehydrogenase 1) in neurons: in vivo model of enhanced glutamate release, altered synaptic plasticity, and selective neuronal vulnerability*. J Neurosci, 2009. **29**(44): p. 13929-44.
58. Wang, Y.T., et al., *The truncated C-terminal RNA recognition motif of TDP-43 protein plays a key role in forming proteinaceous aggregates*. J Biol Chem, 2013. **288**(13): p. 9049-57.
59. Fuentealba, R.A., et al., *Interaction with polyglutamine aggregates reveals a Q/N-rich domain in TDP-43*. J Biol Chem, 2010. **285**(34): p. 26304-14.
60. Holmes, B.B. and M.I. Diamond, *Cellular mechanisms of protein aggregate propagation*. Curr Opin Neurol, 2012. **25**(6): p. 721-6.
61. Couthouis, J., et al., *A yeast functional screen predicts new candidate ALS disease genes*. Proc Natl Acad Sci U S A, 2011. **108**(52): p. 20881-90.
62. Kanouchi, T., T. Ohkubo, and T. Yokota, *Can regional spreading of amyotrophic lateral sclerosis motor symptoms be explained by prion-like propagation?* J Neurol Neurosurg Psychiatry, 2012. **83**(7): p. 739-45.
63. Guo, J.L. and V.M. Lee, *Cell-to-cell transmission of pathogenic proteins in*

*Platelet TDP-43, a dynamic biomarker for Alzheimer's disease*

- neurodegenerative diseases*. Nat Med, 2014. **20**(2): p. 130-8.
64. Morris, J.K., et al., *Is Alzheimer's disease a systemic disease?* Biochim Biophys Acta, 2014. **1842**(9): p. 1340-9.
65. Swerdlow, R.H., *Personal communication*. 2016.
66. Martin, L.J., *Mitochondrial pathobiology in Parkinson's disease and amyotrophic lateral sclerosis*. J Alzheimers Dis, 2010. **20 Suppl 2**: p. S335-56.
67. Han, X.J., et al., *Regulation of mitochondrial dynamics and neurodegenerative diseases*. Acta Med Okayama, 2011. **65**(1): p. 1-10.
68. Wallace, D.C., *Personal communication*. 2015.
69. Sun, Y. and A. Chakrabartty, *Phase to Phase with TDP-43*. Biochemistry, 2017. **56**(6): p. 809-823.
70. Cohen, F.E. and J.W. Kelly, *Therapeutic approaches to protein-misfolding diseases*. Nature, 2003. **426**(6968): p. 905-9.
71. Hartl, F.U. and M. Hayer-Hartl, *Molecular chaperones in the cytosol: from nascent chain to folded protein*. Science, 2002. **295**(5561): p. 1852-8.
72. Sherman, M.Y. and A.L. Goldberg, *Cellular defenses against unfolded proteins: a cell biologist thinks about neurodegenerative diseases*. Neuron, 2001. **29**(1): p. 15-32.

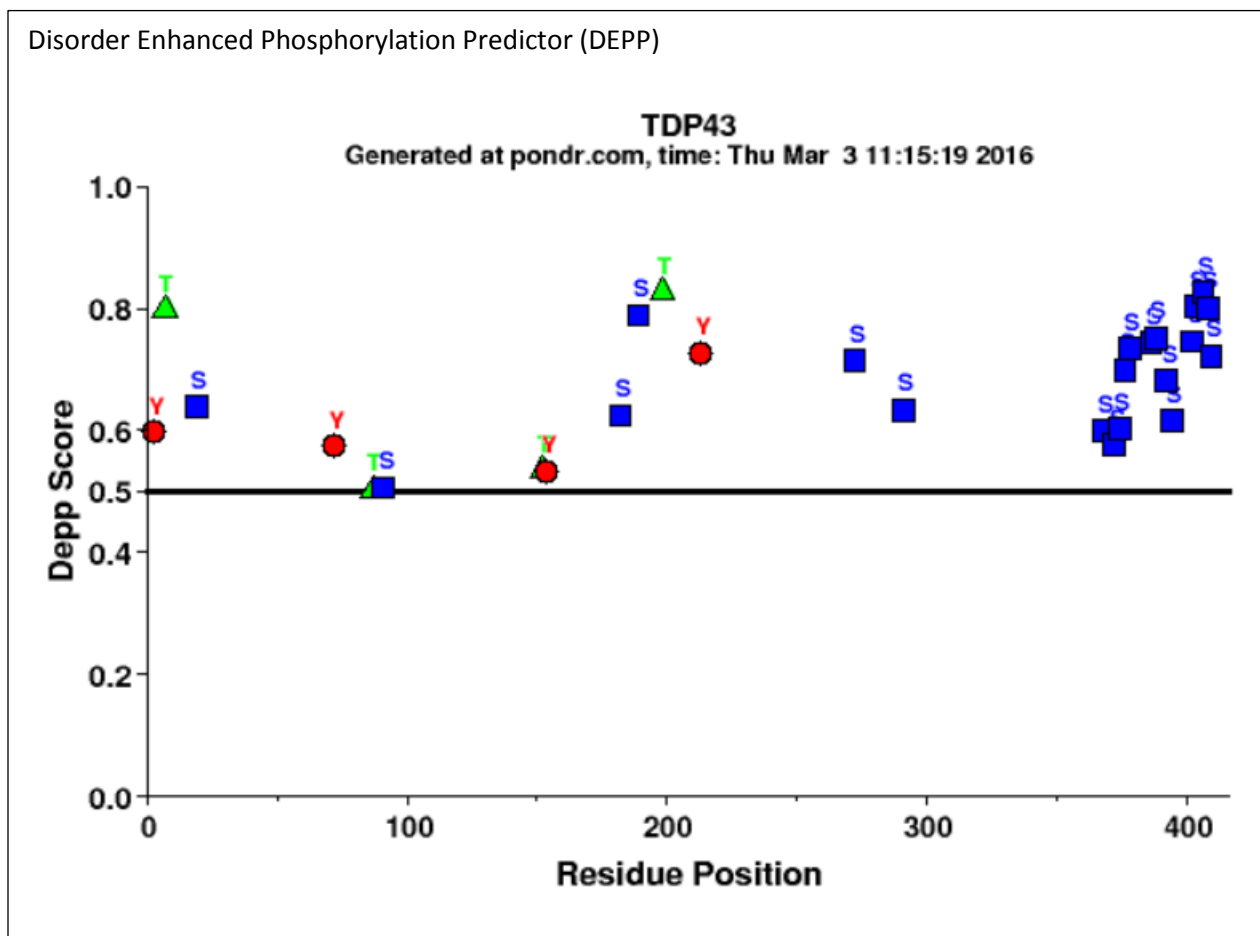

**Fig. 1A. PONDR<sup>®</sup> analysis of TDP43 for potential phosphorylation sites.** Majority of the phosphorylation events were predicted at Serine (Ser) amino acid sites (359-410). Most of the Ser amino acids are located at C-terminus region (20 out of 41; 48.7%)

Copyright © 2002, 2003 Molecular Kinetics, Inc., all rights reserved.

Access to PONDR<sup>®</sup> is provided by Molecular Kinetics (6201 La Pas Trail - Ste 160, Indianapolis, IN 46268;

[www.molecularkinetics.com](http://www.molecularkinetics.com); [main@molecularkinetics.com](mailto:main@molecularkinetics.com)) under license from the WSU Research Foundation.

PONDR<sup>®</sup> is copyright ©1999 by the WSU Research Foundation, all rights reserved.



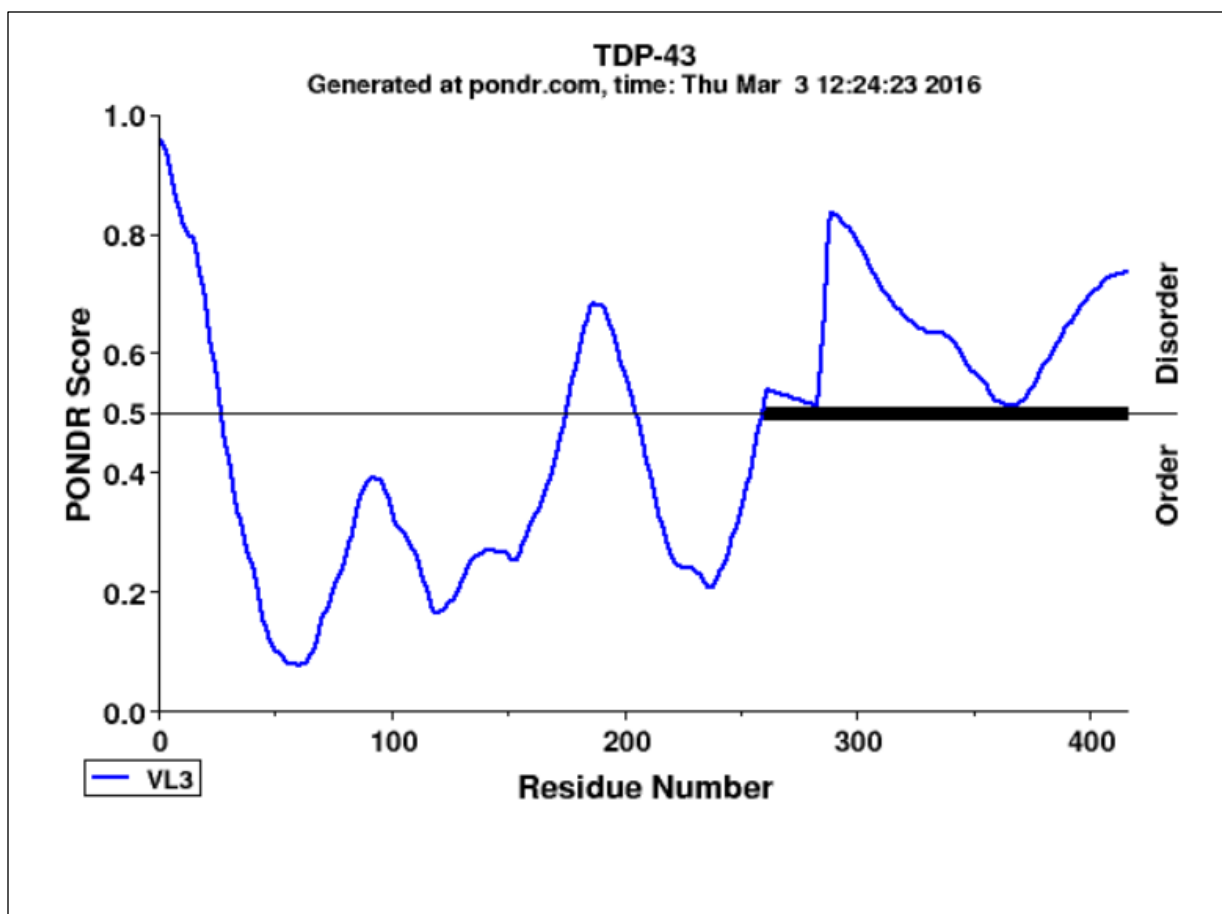

**Fig.1B. PONDNR<sup>®</sup> VL3-BA analysis of TDP43 for identifying the disordered sites.**

The VL3-BA predictor is a feedforward neural network that was trained on regions of 152 long regions of disorder that were characterized by various methods. The region close to C-terminus was identified as disordered sites for TDP-43 which is also most of the Serine amino acids are located.

*Copyright © 2002, 2003 Molecular Kinetics, Inc., all rights reserved.*

*Access to PONDNR<sup>®</sup> is provided by Molecular Kinetics (6201 La Pas Trail - Ste 160, Indianapolis, IN 46268;*

*[www.molecularkinetics.com](http://www.molecularkinetics.com); [main@molecularkinetics.com](mailto:main@molecularkinetics.com)) under license from the WSU Research Foundation.*

*PONDNR<sup>®</sup> is copyright ©1999 by the WSU Research Foundation, all rights reserved.*

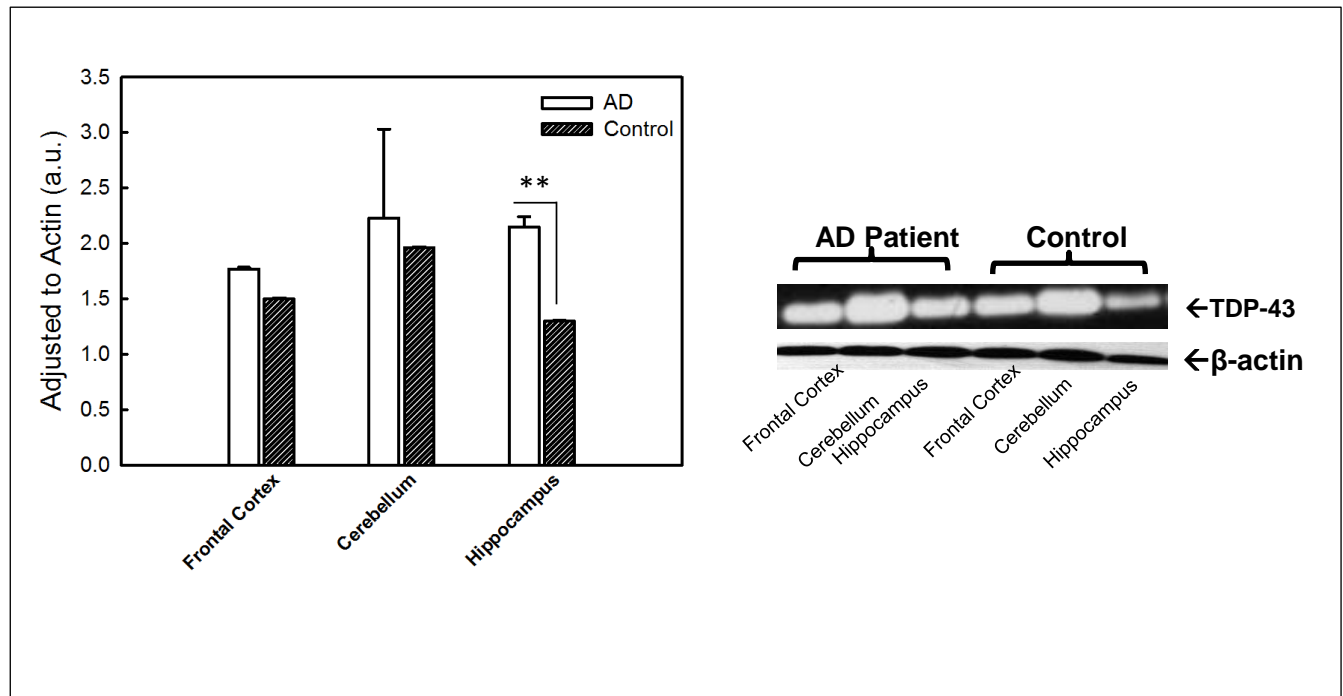

**Fig. 2A. TDP-43 distribution in Alzheimer's disease (AD) patient brain regions.** The tissue from three different regions of the brain was used in this study. The tissue homogenates were analyzed by immunoblotting method. The protein band intensities were normalized to actin. Three post-mortem AD patients and age-matched healthy human brain samples were utilized in this study (n=3). The difference between control and AD in hippocampus region was found statistically significant ( $P \leq 0.015$ ) according to paired t-test.

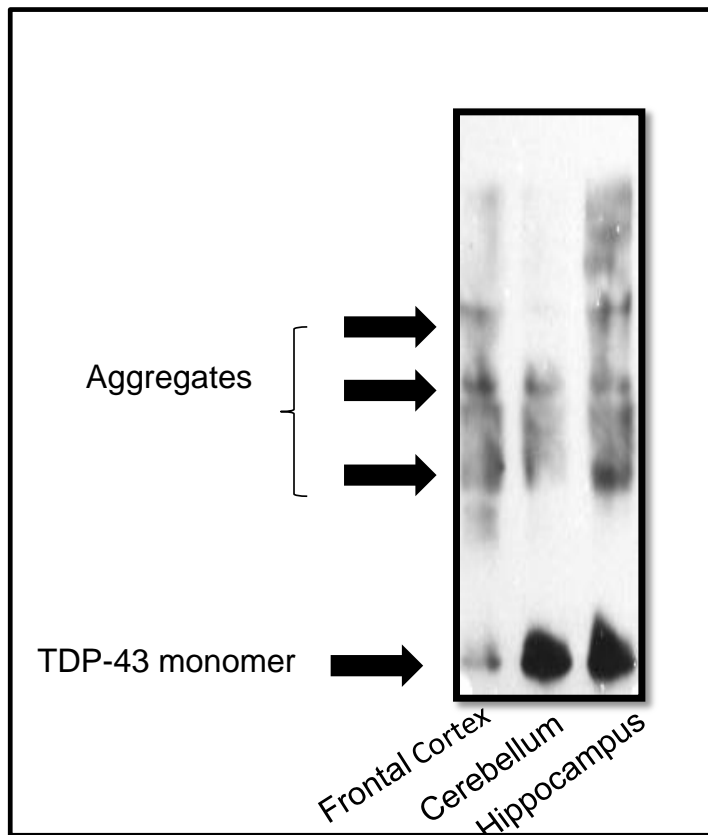

**Fig.2B.TDP-43 protein aggregation in Alzheimer's disease patient's brain region.**

The homogenates from different regions of the brain were resolved in non-reducing SDS/PAGE condition and immunoprobed with anti-TDP-43 (pan) antibody (1:1000 dilution). The TDP-43 protein aggregation is relatively more prominent in hippocampus region.

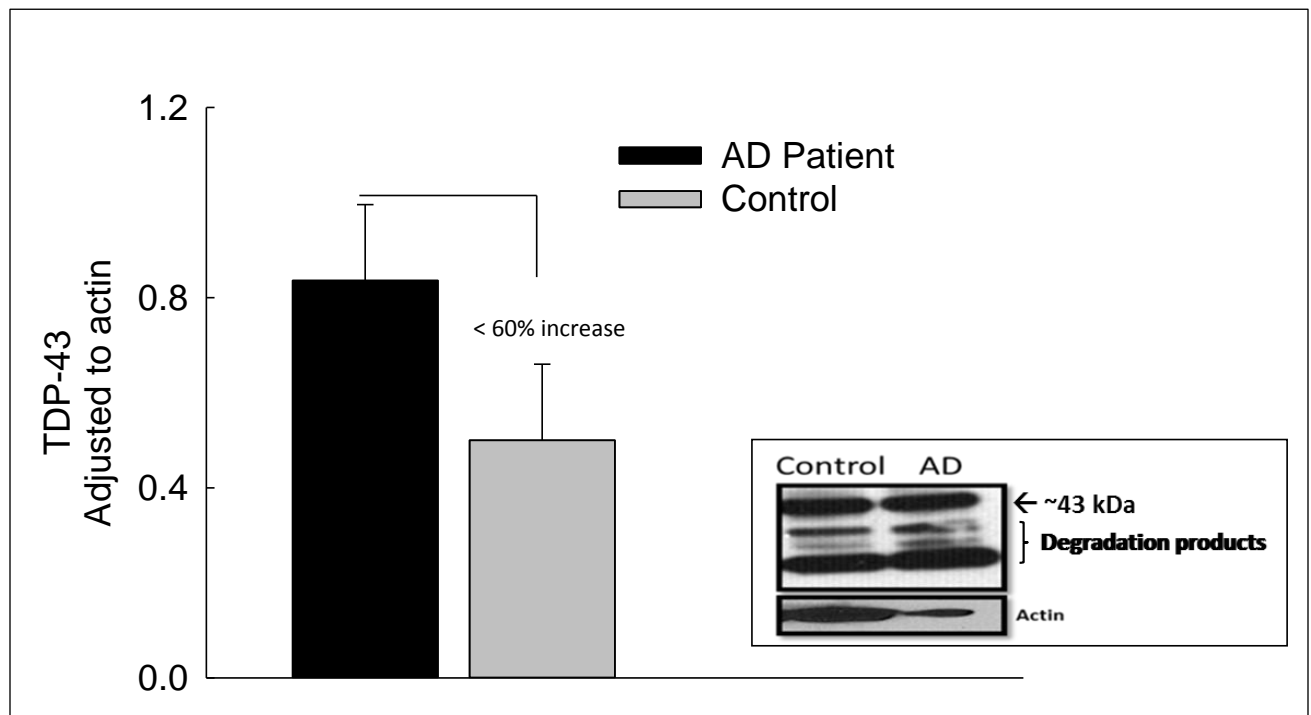

**Fig. 2C Platelet lysate TDP-43 profile.** This figure represents the early TDP-43 studies on platelets obtained from AD patients (n=3) and age-matched healthy subjects (n=3). The platelet lysates were analyzed by a classical immunoblotting assay using anti-TDP-43 (pan0 antibody (1:1000 dilution)).

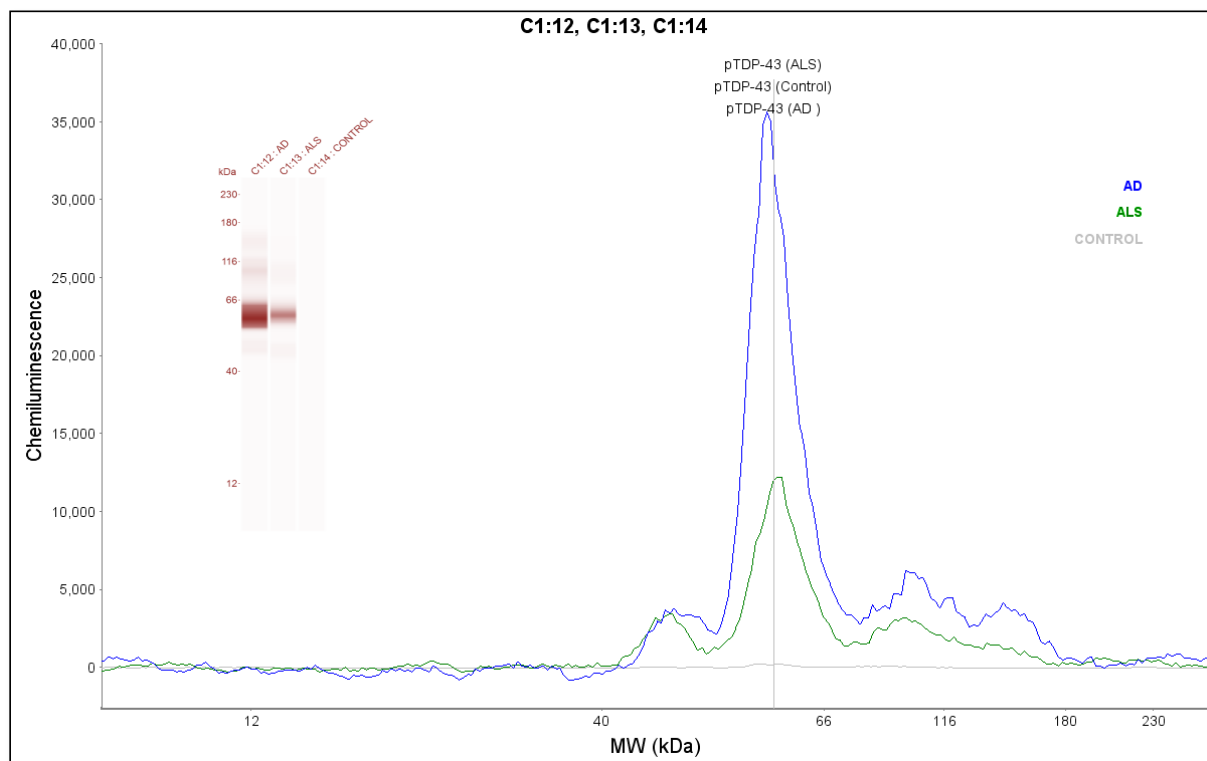

**Fig. 3A Phosphorylated TDP-43 profile in platelet lysates.**

An anti-phospho (Ser409/410-2) TDP-43 antibody was used as an immunoprobng agent. The signals from AD platelet lysates was more pronounced as compare to ALS (disease control) and healthy subjects (control). Inset figure shows a computer generated pseudo band that marks prominent phosphorylated TDP-43 at about 62 kDa.

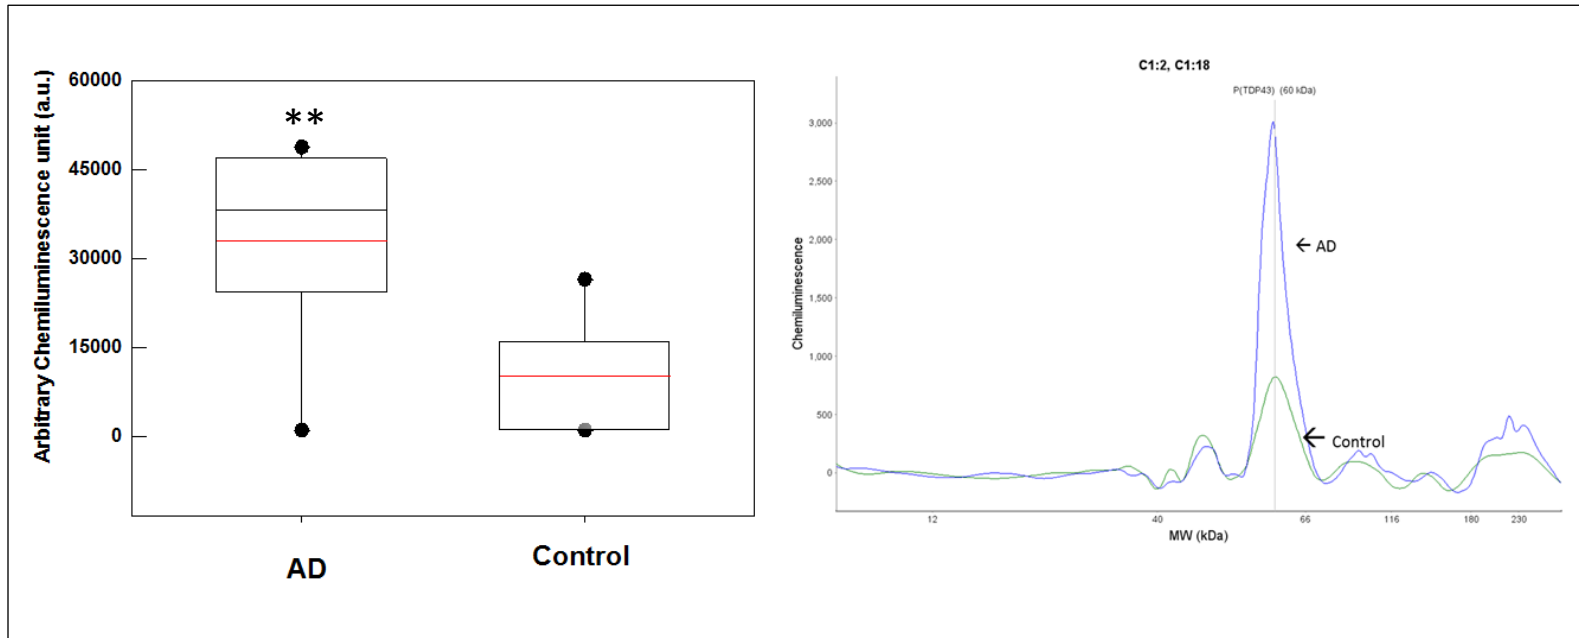

**Fig. 3B. Platelet lysate phosphorylated TDP-43 protein profile.** The platelet lysates obtained from biospecimen bank (n=10 in each group) and analyzed by capillary electrophoresis based gel-less and membrane-less system western assay developed by Proteinsimple (WES). The electropherogram peaks indicate the noticeable difference at about 62 kDa protein that represents phosphorylated TDP-43 protein. Box-whiskers plot represents statistical values. Redline within the boxes mark the median. A paired t-test was employed for statistical analysis. Difference between AD and control platelet phosphorylated TDP-43 was found statistically significant (  $P \leq 0.010$  )
